# Supplementary material for: A School Meals Program Implemented at Scale in Ghana Increases Height-for-Age during Midchildhood in Girls and in Children from Poor Households: A Cluster Randomized Trial
Source: PubMed Central journal article supplement (PMC6686055; doi:10.1093/jn/nxz079), 2019-05-17
Supplement: nxz079_supplemental_file.pdf [file nxz079_supplemental_file.pdf]

Supplementary data.

### Supplementary material

**Supplemental Table 1: Unadjusted means and difference in means at baseline between attrited and non-attrited children for key outcomes and household characteristics in Ghana, HGSF study**

| Variables                         | Non-attrited |              | Attrited |              | Difference in values |
|-----------------------------------|--------------|--------------|----------|--------------|----------------------|
|                                   | <i>n</i>     | Mean (prop.) | <i>n</i> | Mean (prop.) |                      |
| Age, y                            | 2283         | 8.22         | 849      | 9.16         | -0.95                |
| Child is female                   | 2283         | 0.46         | 850      | 0.53         | -0.07                |
| HAZ                               | 2019         | -1.07        | 850      | -1.10        | 0.037                |
| BAZ                               | 2056         | -0.66        | 843      | -0.67        | 0.01                 |
| Is enrolled in school             | 2126         | 0.99         | 777      | 0.97         | 0.02***              |
| Lives in northern regions         | 2283         | 0.47         | 850      | 0.43         | 0.03*                |
| Household head education years, y | 2283         | 3.73         | 850      | 3.71         | 0.01                 |
| Household head age, y             | 2269         | 44.43        | 841      | 45.75        | -1.31***             |
| Log of household expenditures     | 2283         | 7.53         | 849      | 7.51         | 0.02                 |
| Household size, n                 | 2283         | 6.62         | 850      | 6.88         | -0.26**              |
| Dependency ratio                  | 2278         | 2.01         | 848      | 1.98         | 0.03                 |
| Polygamous household              | 2283         | 0.01         | 850      | 0.01         | 0.01                 |
| Female-headed household           | 2283         | 0.19         | 850      | 0.21         | -0.01                |
| Urban                             | 2283         | 0.07         | 850      | 0.06         | 0.018                |

**Notes:**<sup>1</sup> All unadjusted baseline values are means or proportions. HAZ, height-for-age z-score; BAZ, BMI-for-age z-score. The dependency ratio calculated at household level by dividing the number of children aged 0-18y by the number of adults. \* $P < 0.10$ , \*\* $P < 0.05$ , \*\*\* $P < 0.001$ .

Supplementary data.

**Supplemental Table 2: Correlates of program uptake at endline after 3y in the intervention group, in children aged 5-15y at baseline living in treatment communities in Ghana, HGSF study<sup>1</sup>**

|                           | <b>Odds Ratio</b> | <b>S.E.</b> | <b>P</b> |
|---------------------------|-------------------|-------------|----------|
| Is aged 5-8y              | 2.91              | 0.57        | <0.001   |
| Child is female           | 0.76              | 0.14        | 0.141    |
| Lives in northern regions | 4.20              | 2.75        | 0.028    |
| From poor household       | 1.15              | 0.33        | 0.617    |
| In private school         | 0.05              | 0.02        | <0.001   |
| Household size, n         | 1.02              | 0.05        | 0.650    |
| Female-headed household   | 0.82              | 0.25        | 0.516    |
| Age of household head     | 1.00              | 0.01        | 0.937    |
| Constant                  | 0.74              | 0.50        | 0.656    |
| <i>n</i>                  | 1,466             |             |          |

**Notes:** <sup>1</sup>Mixed effects logistic regression results with random intercepts at cluster level. S.E., standard error.

Supplementary data.

**Supplemental Table 3: Unadjusted mean HAZ and BAZ, at baseline and after 3y in the intervention and control groups, and adjusted ANCOVA estimates for these indicators, in children aged 5-15y at baseline living in the 3 northern regions, and by subgroups aged 5-8y and 9-15y at baseline living in treatment and control communities in Ghana, HGSF study<sup>1</sup>**

| Sub-group     |     | Control |     |       |     | School feeding |     |       |     | (ANCOVA) |      |       |
|---------------|-----|---------|-----|-------|-----|----------------|-----|-------|-----|----------|------|-------|
|               |     | BL      |     | EL    |     | BL             |     | EL    |     | Impact   | SE   | P     |
|               |     | mean    | n   | mean  | n   | mean           | n   | mean  | n   |          |      |       |
| Girls (north) | HAZ | -1.14   | 258 | -1.33 | 188 | -1.07          | 348 | -0.95 | 257 | 0.22     | 0.08 | 0.007 |
|               | BAZ | -0.68   | 263 | -0.79 | 193 | -0.70          | 350 | -0.80 | 252 | 0.05     | 0.12 | 0.652 |
| 5-8y (north)  | HAZ | -1.06   | 148 | -1.29 | 111 | -0.99          | 202 | -0.86 | 164 | 0.27     | 0.10 | 0.010 |
|               | BAZ | -0.65   | 151 | -0.83 | 112 | -0.60          | 204 | -0.76 | 159 | 0.11     | 0.15 | 0.433 |
| 9-15y (north) | HAZ | -1.24   | 106 | -1.39 | 76  | -1.20          | 138 | -1.10 | 93  | 0.15     | 0.14 | 0.298 |
|               | BAZ | -0.73   | 107 | -0.74 | 80  | -0.89          | 138 | -0.87 | 93  | -0.04    | 0.18 | 0.823 |

<sup>1</sup> All unadjusted baseline and endline values are means. HAZ, height-for-age z-score; BAZ, BMI-for-age z-score. SE., standard error.
